# Supplementary material for: In Vitro Activity of Sodium New Houttuyfonate Alone and in Combination with Oxacillin or Netilmicin against Methicillin-Resistant Staphylococcus aureus
Source: PubMed Central journal article supplement (PMC3699466; doi:10.1371/journal.pone.0068053), 2013-07-02
Supplement: pone.0068053.s004.pdf [file pone.0068053.s004.pdf]

**Table S1. MICs and FICI of SNH and eight antibiotics against 12 MRSA strains in checkerboard assay**

| Strain    | origin                            | SCC<br><i>mec</i><br>type | MIC in single use (µg/mL) |     |     |     |     |      |      |     |           |         | FICI<br>MIC in combination (µg/mL) |         |         |          |         |         |               |
|-----------|-----------------------------------|---------------------------|---------------------------|-----|-----|-----|-----|------|------|-----|-----------|---------|------------------------------------|---------|---------|----------|---------|---------|---------------|
|           |                                   |                           | SNH                       | OXA | CEF | MEM | VAN | LVX  | MIN  | NET | SXT       | SNH/OXA | SNH/CEF                            | SNH/MEM | SNH/VAN | SNH/LVX  | SNH/MIN | SNH/NET | SNH/SXT       |
| MRSA 5-01 | Pneumonia                         | III                       | 32                        | 512 | 256 | 32  | 1   | 32   | 8    | 16  | 0.5/9.5   | 0.28    | 0.31                               | 0.25    | 1       | 1        | 0.63    | 0.38    | 0.75          |
|           |                                   |                           |                           |     |     |     |     |      |      |     |           | 8/16    | 8/16                               | 4/4     | 16/0.5  | 16/16    | 16/1    | 4/4     | 8/(0.25/4.8)  |
| MRSA 5-16 | Upper respiratory tract infection | III                       | 16                        | 512 | 256 | 64  | 1   | 4    | 8    | 32  | 1/19      | 0.38    | 0.38                               | 0.31    | 0.63    | 1        | 0.75    | 0.25    | 0.5           |
|           |                                   |                           |                           |     |     |     |     |      |      |     |           | 4/64    | 4/32                               | 4/4     | 2/0.5   | 8/2      | 8/2     | 2/4     | 4/(0.25/4.8)  |
| MRSA 5-20 | Skin and soft tissue wounds       | II                        | 32                        | 128 | 64  | 16  | 1   | 8    | 8    | 16  | 0.5/9.5   | 0.38    | 0.38                               | 0.25    | 1       | 0.53     | 0.75    | 0.25    | 0.75          |
|           |                                   |                           |                           |     |     |     |     |      |      |     |           | 8/16    | 8/8                                | 4/2     | 16/0.5  | 1/4      | 16/2    | 4/2     | 8/(0.25/4.8)  |
| MRSA 5-33 | Pneumonia                         | III                       | 32                        | 512 | 256 | 32  | 1   | 16   | 8    | 16  | 0.5/9.5   | 0.56    | 0.31                               | 0.38    | 1       | 2        | 0.63    | 0.38    | 0.63          |
|           |                                   |                           |                           |     |     |     |     |      |      |     |           | 16/32   | 8/16                               | 8/4     | 16/0.5  | 32/16    | 16/1    | 8/2     | 4/(0.25/4.8)  |
| MRSA 6-03 | Bacteremia                        | III                       | 16                        | 16  | 16  | 8   | 1   | 8    | 0.5  | 4   | 0.5/9.5   | 0.5     | 0.63                               | 0.38    | 2       | 1        | 0.63    | 0.5     | 2             |
|           |                                   |                           |                           |     |     |     |     |      |      |     |           | 4/4     | 8/2                                | 4/1     | 16/1    | 8/4      | 2/0.25  | 4/1     | 16/(0.5/9.5)  |
| MRSA 6-29 | Bacteremia                        | III                       | 32                        | 256 | 128 | 32  | 1   | 32   | 0.5  | 8   | 1/19      | 0.31    | 0.38                               | 0.25    | 1       | 1        | 0.63    | 0.5     | 0.75          |
|           |                                   |                           |                           |     |     |     |     |      |      |     |           | 8/16    | 8/16                               | 4/4     | 16/0.5  | 16/16    | 16/0.06 | 8/2     | 16/(0.25/4.8) |
| MRSA 8-36 | Pneumonia                         | III                       | 32                        | 512 | 256 | 64  | 1   | 32   | 8    | 64  | 1/19      | 0.31    | 0.31                               | 0.19    | 0.75    | 1        | 0.63    | 0.25    | 0.63          |
|           |                                   |                           |                           |     |     |     |     |      |      |     |           | 8/32    | 8/16                               | 4/4     | 16/0.25 | 16/16    | 16/1    | 4/8     | 4/(0.5/9.5)   |
| MRSA 8-45 | Urinary tract infection           | III                       | 32                        | 512 | 256 | 32  | 1   | 8    | 8    | 16  | 0.5/9.5   | 0.5     | 0.63                               | 0.25    | 0.75    | 0.75     | 0.63    | 0.25    | 1             |
|           |                                   |                           |                           |     |     |     |     |      |      |     |           | 8/128   | 16/32                              | 4/4     | 16/0.25 | 4/4      | 16/1    | 4/2     | 16/(0.25/4.8) |
| MRSA 8-48 | Upper respiratory tract infection | III                       | 32                        | 512 | 256 | 128 | 1   | 32   | 8    | 1   | 1/19      | 0.5     | 0.5                                | 0.16    | 1       | 2        | 0.75    | 0.5     | 0.38          |
|           |                                   |                           |                           |     |     |     |     |      |      |     |           | 8/128   | 8/64                               | 4/4     | 16/0.5  | 32/32    | 16/2    | 8/0.25  | 4/(0.25/4.8)  |
| MRSA 8-52 | Skin and soft tissue wounds       | III                       | 64                        | 256 | 256 | 64  | 1   | 0.25 | 0.25 | 2   | 0.125/2.4 | 0.38    | 0.38                               | 0.31    | 0.75    | 0.75     | 0.5     | 0.38    | 0.53          |
|           |                                   |                           |                           |     |     |     |     |      |      |     |           | 16/32   | 16/32                              | 16/4    | 16/0.5  | 16/0.125 | 16/0.06 | 8/0.5   | 2/(0.06/1.2)  |
| ATCC33591 | ATCC                              | III                       | 32                        | 256 | 32  | 16  | 1   | 0.25 | 8    | 4   | 1/19      | 0.31    | 0.5                                | 0.25    | 1       | 0.75     | 0.63    | 0.25    | 0.63          |
|           |                                   |                           |                           |     |     |     |     |      |      |     |           | 8/16    | 8/8                                | 4/2     | 16/0.5  | 8/0.125  | 16/1    | 4/0.5   | 4/(0.5/9.5)   |
| Mu 50     | ATCC                              | II                        | 64                        | 512 | 128 | 32  | 8   | 16   | 8    | 16  | 0.25/4.8  | 0.5     | 0.56                               | 0.38    | 0.75    | 1        | 0.5     | 0.5     | 1             |
|           |                                   |                           |                           |     |     |     |     |      |      |     |           | 16/128  | 32/8                               | 16/4    | 16/4    | 32/8     | 16/2    | 16/4    | 32/(0.13/2.4) |
