# Supplementary material for: In Vitro Activity of Sodium New Houttuyfonate Alone and in Combination with Oxacillin or Netilmicin against Methicillin-Resistant Staphylococcus aureus
Source: PubMed Central journal article supplement (PMC3699466; doi:10.1371/journal.pone.0068053), 2013-07-02
Supplement: pone.0068053.s005.pdf [file pone.0068053.s005.pdf]

**Table S2. Susceptibility of 20 MSSA strains to SNH and oxacillin**

| Antimicrobial agent | MIC of reference strain ATCC 29213 | MIC of 20 clinical isolates <sup>a</sup> (µg/mL) |     |     | Susceptible/total (% Susceptibility) |
|---------------------|------------------------------------|--------------------------------------------------|-----|-----|--------------------------------------|
|                     |                                    | Range                                            | 50% | 90% |                                      |
| SNH                 | 32                                 | 16-32                                            | 32  | 32  | NA <sup>b</sup>                      |
| OXA                 | 0.5                                | 0.25-0.5                                         | 0.5 | 0.5 | 20/20 (100%)                         |

a. Origins of the 20 clinical isolates: Upper respiratory tract infection, 8 strains; pneumonia, 4 strains; skin and soft tissue wounds, 8 strains.

b. NA, not applicable
